# Supplementary material for: eModel-BDB: a database of comparative structure models of drug-target interactions from the Binding Database
Source: PubMed Central journal article supplement (PMC6131211; doi:10.1093/gigascience/giy091), 2018-07-24
Supplement: giy091_response_to_reviewer_comments_revision1.pdf [file giy091_response_to_reviewer_comments_revision1.pdf]

## Author's Response To Reviewer Comments

Close

Our responses are provided in a separate document "ResponseLetter.pdf" uploaded as Supplementary Material.

Close
